# Supplementary material
Source: Royal Society of Chemistry journal article supplement (doi:10.1039/d6me00034g)
Supplement: d6me00034g1.pdf [file d6me00034g1.pdf]

## Supplementary Information

### **Two-dimensional interaction parameter histograms as a simple and versatile nanoporous material representation for machine learning prediction of adsorption properties**

Tatiane Gercina de Vilas,<sup>1,#</sup> Fernando Fajardo-Rojas,<sup>2,4,#</sup> Omar Mansurov,<sup>1,3</sup> Ruby Devaisher,<sup>1</sup>  
Eric Toberer,<sup>2,4</sup> Diego A. Gómez-Gualdrón<sup>1,4\*</sup>

<sup>1</sup> Department of Chemical and Biological Engineering, Colorado School of Mines, 1601 Illinois St., Golden CO 80401, USA

<sup>2</sup> Department of Physics, Colorado School of Mines, 1500 Illinois St., Golden CO 80401, USA

<sup>3</sup> Computer Science Department, Colorado School of Mines, 1500 Illinois St., Golden CO 80401, USA

<sup>4</sup> Materials Science Program, Colorado School of Mines, 1601 Illinois St., Golden CO 80401, USA

#These authors contributed equally

\*Corresponding author: [dgomezgualdron@mines.edu](mailto:dgomezgualdron@mines.edu)

## Table of Content:

|                                                                                                                                                 |            |
|-------------------------------------------------------------------------------------------------------------------------------------------------|------------|
| <b>Computational Infrastructure Availability</b>                                                                                                | <b>S2</b>  |
| <b>Section S1. 2D-IPH example</b>                                                                                                               | <b>S2</b>  |
| <b>Section S2. Adsorption Loading Prediction via General model</b>                                                                              | <b>S3</b>  |
| <b>Section S2.1. Machine Learning Details</b>                                                                                                   | <b>S3</b>  |
| <b>Section S2.2. Training and testing details of the General Adsorption Model</b>                                                               | <b>S4</b>  |
| <b>Section S2.3. Summary of the Data Used in All the Studies</b>                                                                                | <b>S5</b>  |
| <b>Section S3. Adsorption Loading Prediction via Single-Feature Stacking (SFS) Model</b>                                                        | <b>S6</b>  |
| <b>Section S3.1. Machine Learning Details</b>                                                                                                   | <b>S6</b>  |
| <b>Section S3.2. Training details of the Single-Feature Stacking (SFS) Data</b>                                                                 | <b>S6</b>  |
| <b>Section S4. Henry's Constant Prediction via Base Models</b>                                                                                  | <b>S8</b>  |
| <b>Section S4.1. Machine Learning Details</b>                                                                                                   | <b>S8</b>  |
| <b>Section S5. Henry's Constant Prediction via Transfer Learning</b>                                                                            | <b>S10</b> |
| <b>Section S5.1. Machine Learning Details</b>                                                                                                   | <b>S10</b> |
| <b>Section S6. Model variation tests</b>                                                                                                        | <b>S18</b> |
| <b>Section S6.1. Performance Comparison of Different Representation Variants in the Prediction of Molecular Loading and Henry's Coefficient</b> | <b>S18</b> |
| <b>Section S6.2. Grid Resolution</b>                                                                                                            | <b>S19</b> |

## Computational Infrastructure Availability

All the computational infrastructure, examples and data used can be found in the following repository:

[https://github.com/gomezgualdronlab/2D-IPhs\\_prediction\\_infrastructure](https://github.com/gomezgualdronlab/2D-IPhs_prediction_infrastructure)

The computational infrastructure to build the 2D-IPhs representation can be found in the following repository:

[https://github.com/JFajardoRojas/2D-IPhs\\_builder](https://github.com/JFajardoRojas/2D-IPhs_builder)

## Section S1. 2D-IPH example

Note that different MOFs usually have different number of grid points. However, the 2D-IPhs for all MOFs have the same number of bins. Briefly, to build each 2D-IPH, we divided  $d$  into 20 segments between 0 and 20 Å, and each of the interaction parameters into 74 segments with  $\epsilon$  spanning 0-350 K,  $\sigma$  0.0–4.54 Å, and  $q$  -3 to 3  $e$ . Thus, each histogram has 20 x 74 = 1,480 bins (see example in **Fig. S1**). The value for each bin is the number of grid points that has particular ( $q,d$ ) or ( $\epsilon, d$ ), or ( $\sigma, d$ ) combination, normalized by the total number of grid points. In other words, each bin value is a probability density. Grid points with values outside the above ranges are counted in the closest segment (e.g., a grid point with  $d = 30$  Å is counted in the  $d = 20$  Å bin)..

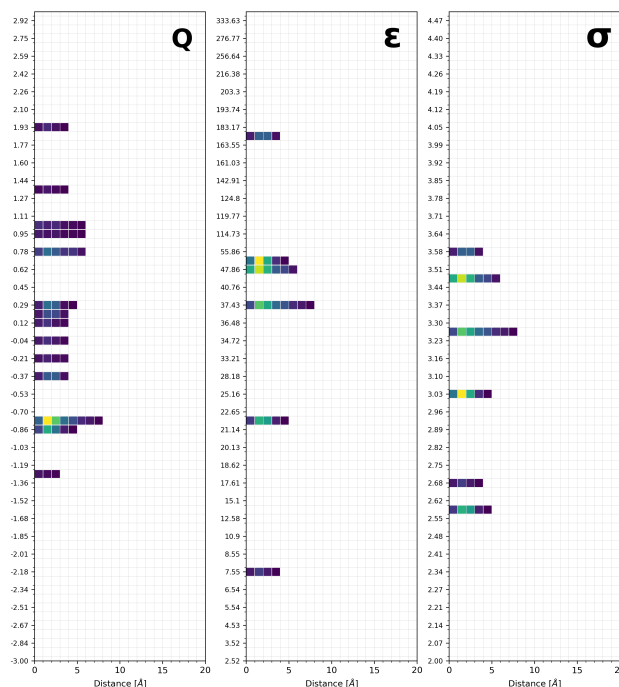

**Fig. S1.** Representative 2D-IPH for each interaction parameter for one of the MOFs. The value in each bin is a probability density calculated as the number of grid points falling in the distance and interaction parameter range spanned by the bin, normalized by the total number of grid points. White blocks represent bins with no identified interaction parameter-distance pair (probability density equal to zero). Colored blocks represent bins with probability densities higher than zero, with the color scale going from low density (purple) to high density (yellow).

Each histogram is flattened by concatenating their rows, and the flattened histograms are in turn concatenated to produce a feature vector with  $1,480 \times 3 = 4,440$  features. The use of a variance filter is optional and is used as a “knob” to adjust the size of the MOF representation to adapt to variations in training dataset size and computational resources. The rationale for the variance filter is the hypothesis that bins whose values are very similar across MOFs are less useful to discriminate MOFs based on their performance, and thus less informative for learning. The variance threshold used to eliminate bins can be considered as a hyperparameter.

## Section S2. Adsorption Loading Prediction via General model

### Section S2.1. Machine Learning Details

Additional data files for this section can be found at:

<https://osf.io/vu3hn/overview>

In the folder *General\_Model\_Data*, *SFS\_Data* and *Scratch\_Data*

**Machine learning model description.** Machine learning models used to predict adsorption loading correspond to fully connected feedforward neural networks (multilayer perceptron, MLPs) implemented using TensorFlow and Keras. The models were designed to perform supervised regression of adsorption loading from the assembled MOF–adsorbate–fugacity feature vectors.

Each model consists of:

- An input layer whose dimensionality matches the number of input features,
- A configurable stack of hidden layers,
- A single linear output neuron that predicts the scaled adsorption loading.

All hidden layers employ nonlinear activation functions selected via hyperparameter exploration using a Bayesian approach for the architectural configuration exploration. The output layer uses a linear activation function, consistent with continuous regression targets.

**Training procedure.** A Bayesian hyperparameter optimization workflow was implemented with KerasTuner (*BayesianOptimization*) on a fixed train/validation/test split. In each trial, a feed-forward multi-layer perceptron (MLP) was trained with Adam for up to 100 epochs (batch size 256), with early stopping on validation loss (MAE) (patience 10, best weights restored) and **ReducedLRonPlateau** learning-rate decay. The Bayesian search minimized validation MAE over 20 trials across the space: number of layers (2–5), units per layer (64 / 128 / 256 / 512), dropout (0.0 – 0.4), L2 regularization (1e-6 to 1e-3), learning rate (1e-4 to 3e-3), and activation (ReLU or GELU). After search, the best-performing model was selected, evaluated on the held-out test set (MAE/ root mean squared error RMSE/R<sup>2</sup>, including per-adsorbate metrics), and exported together with the fitted preprocessor for fully reproducible inference.

Further details can be found in the repository:

[https://github.com/gomezgualdronlab/2D-IPHS\\_prediction\\_infrastructure/tree/main/2D-IPHS-Results-General-model](https://github.com/gomezgualdronlab/2D-IPHS_prediction_infrastructure/tree/main/2D-IPHS-Results-General-model)

**Data preprocessing and scaling.** Data processing is implemented as a scikit-learn *ColumnTransformer* fitted only on the **training split** and then reused unchanged for validation/test (to avoid data leakage). The model inputs are assembled from 2D-IPHS (named using the convention “feature\_\*”), molecular descriptors (chg, bond\_length, eps\_eff, sig\_eff), fugacity, and textural descriptors (LPD, PLD, SA\_grav (GSA), VF, PSSD, density (inverse MOF density)). These numerical features are processed with a pipeline of **median imputation** followed by **z-score standardization** (*StandardScaler*).

The fitted preprocessing object is saved (preprocessor.joblib) and consistently applied during training, and inference so all downstream results are in the same transformed feature space.

**Reproducibility and workflow automation.** All model training, hyperparameter exploration, and complementary files generation were implemented in Python 3.11.5. Hyperparameter combinations were generated systematically, and model configurations were identified using a consistent naming convention encoding activation function, optimizer, learning rate, metric, number of nodes, and number of layers.

This fully scripted approach enables reproduction of individual model configurations and traceability between trained models, preprocessing scalers, and validation performance.

Here we present the combination of parameters that showed with the best performance and therefore were selected for the *general adsorption model*.

**Table S1.** Optimal parameters for the general adsorption model

| Parameter                   | Value selected |
|-----------------------------|----------------|
| Input dimensions (features) | 55             |
| Hidden layers (count)       | 2              |
| Hidden layers (widths)      | 128, 256       |

|                                            |                              |
|--------------------------------------------|------------------------------|
| <b>Hidden activation</b>                   | GELU                         |
| <b>Output layer</b>                        | Dense (1), linear activation |
| <b>Loss</b>                                | MSE                          |
| <b>Optimizer</b>                           | Adam                         |
| <b>Learning rate</b>                       | $1.0 \times 10^{-4}$         |
| <b>Total parameters (weights + biases)</b> | 40,449                       |

## Section S2.2. Training and testing details of the General Adsorption Model

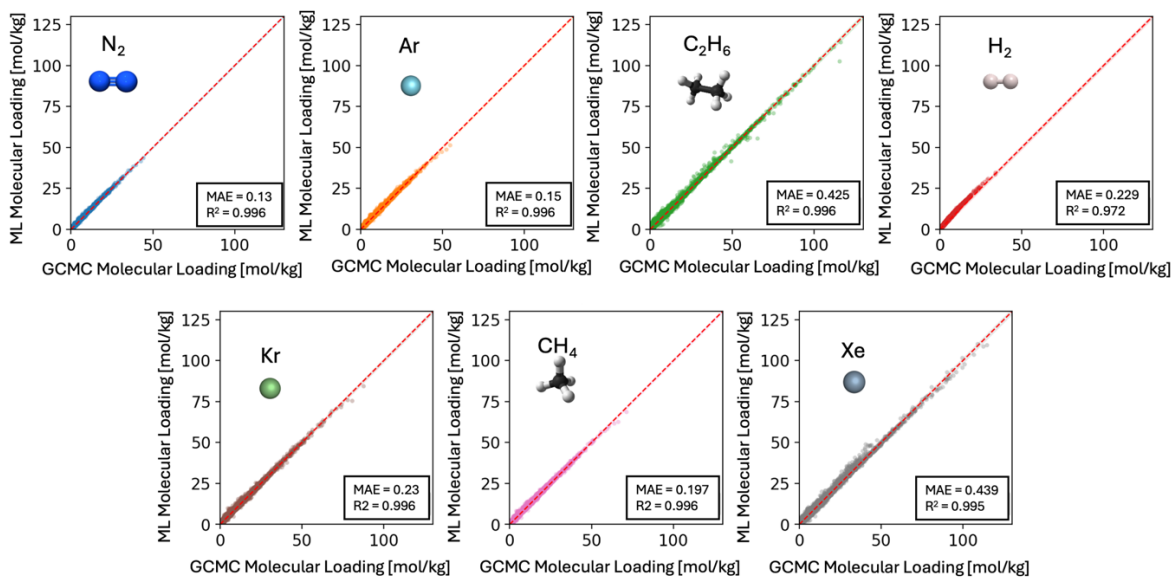

**Fig. S2.** Molecule adsorption loading prediction on N<sub>2</sub>, Ar, C<sub>2</sub>H<sub>6</sub>, H<sub>2</sub>, Kr, CH<sub>4</sub>, and Xe. Each plot shows a 95% confidence interval for the prediction, R<sup>2</sup>, and mean absolute error (MAE) in each plot.

Dense sampling at low fugacity was employed to anchor adsorption behavior in the low-loading regime, while higher fugacity points ensure continuity with the full pressure grids. Separate anchor sets were defined for training, validation, and testing datasets (**Table S2**).

**Table S2.** Fugacities used in GCMC simulations, and used in training, validation and testing of the general adsorption model.

| Fugacity (bar) |          |      |
|----------------|----------|------|
| Validation     | Training | Test |
| 0.02           | 0.01     | 0.02 |
| 0.04           | 0.025    | 0.04 |
| 0.06           | 0.05     | 0.06 |

|      |       |      |
|------|-------|------|
| 0.08 | 0.075 | 0.08 |
| 0.2  | 0.1   | 0.2  |
| 0.4  | 0.25  | 0.4  |
| 0.6  | 0.5   | 0.6  |
| 0.8  | 0.75  | 0.8  |
| 2.5  | 1     | 1    |
| 30   | 5     | 2.5  |
| 60   | 10    | 5    |
| 80   | 50    | 10   |
| 90   | 75    | 25   |
| -    | 10    | 50   |
| -    | -     | 100  |

### Section S2.3. Summary of the Data Used in All the Studies

#### General model data summary (Data from Anderson et al.<sup>1</sup>)

|            |           |                            |                              |
|------------|-----------|----------------------------|------------------------------|
| Training   | 4,997,268 | MOF + adsorbate + fugacity | (200 alchemical adsorbates)  |
| Validation | 517,120   | MOF + adsorbate + fugacity | (200 alchemical adsorbates)  |
| Testing    | 122,584   | MOF + adsorbate + fugacity | (7 real molecules* + Helium) |

\* 7 molecules considered (N<sub>2</sub>, Ar, C<sub>2</sub>H<sub>6</sub>, H<sub>2</sub>, Kr, CH<sub>4</sub>, Xe)

#### SFS and Scratch model data summary (GCMC data collected in this study)

|            |        |          |                                                                   |
|------------|--------|----------|-------------------------------------------------------------------|
| Training   | 12,353 | (12,550) | MOF + fugacity + CO <sub>2</sub> (C <sub>3</sub> H <sub>8</sub> ) |
| Validation | 875    | (1,198)  | MOF + fugacity + CO <sub>2</sub> (C <sub>3</sub> H <sub>8</sub> ) |
| Testing    | 6,945  | (6,817)  | MOF + fugacity + CO <sub>2</sub> (C <sub>3</sub> H <sub>8</sub> ) |

#### Henry's coefficient data summary (Widom Insertion data collected in this study)

|            |        |                                   |
|------------|--------|-----------------------------------|
| Training   | 25,568 | MOF for each molecule considered* |
| Validation | 6,392  | MOF for each molecule considered* |
| Testing    | 7,990  | MOF for each molecule considered* |

\* 4 molecules considered (H<sub>2</sub>O, NH<sub>3</sub>, CO<sub>2</sub>, N<sub>2</sub>)

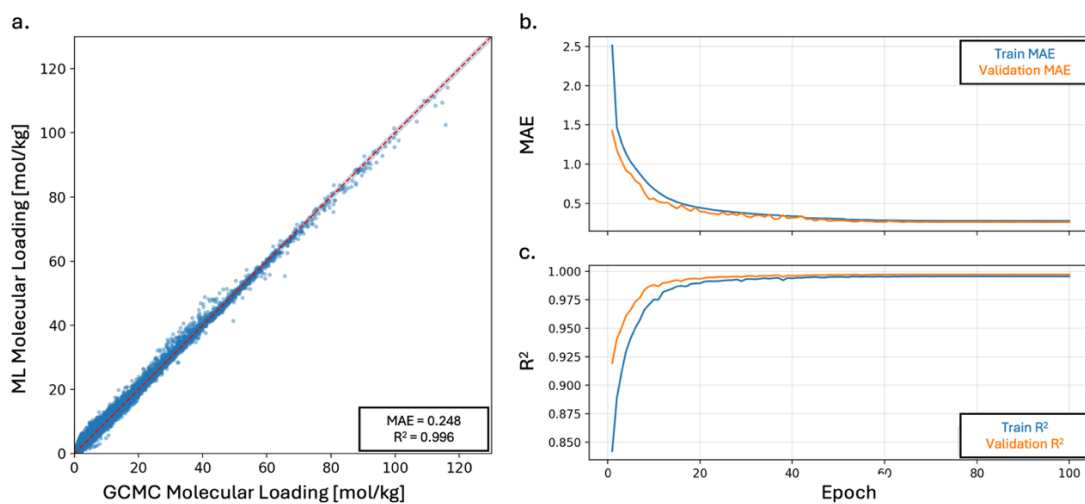

**Fig. S3.** General model results. a) Parity plot of the GCMC data versus ML predicted data in the test set. b) Learning curves of the Mean Absolute Error (MAE), and c)  $R^2$  as a function of the evaluated epochs.

## Section S3. Adsorption Loading Prediction via Single-Feature Stacking (SFS) Model

### Section S3.1. Machine Learning Details

**Scratch model:** A direct multi-layer perceptron MLP regressor trained end-to-end on the feature space composed by 2D-IPHS (44 features, pruned as described in the manuscript), fugacity, textural descriptors (LPD, PLD, GSA, VF, PSSD, density) on the training/validation/test split to predict directly molecular loading isotherms for  $\text{CO}_2$  and  $\text{C}_3\text{H}_8$ . Note that there is no description of the molecular entity since each model is train specifically for a molecule.

**SFS model:** This approach consists in a two-stage setup. First, an existing expert/base model predicts loading for each sample (This model is the described *General model*). Then, that prediction is appended as a new feature to the downstream feature set (same as *General model*), while some molecule-specific descriptors are dropped (chg, bond\_length, eps\_eff, sig\_eff). A second MLP then is trained on this stacked feature space to predict the molecular loading of an specific molecule, either  $\text{CO}_2$  or  $\text{C}_3\text{H}_8$ .

Here, we present the model parameters obtained for Scratch and SFS models to predict  $\text{CO}_2$  and  $\text{C}_3\text{H}_8$  after hyperparameter optimization (**Table S3**).

**Table S3.** Parameters obtained for  $\text{CO}_2$  and  $\text{C}_3\text{H}_8$  models training at 10% data availability (Scratch and SFS) after hyperparameter exploration.

| Parameter                         | Scratch- $\text{CO}_2$ | Scratch-Propane      | SFS- $\text{CO}_2$   | SFS-Propane          |
|-----------------------------------|------------------------|----------------------|----------------------|----------------------|
| <b>Input dimension (features)</b> | 51                     | 51                   | 52                   | 52                   |
| <b>Hidden layers (count)</b>      | 3                      | 3                    | 3                    | 3                    |
| <b>Hidden layer widths</b>        | 256, 128, 64           | 256, 128, 64         | 256, 128, 64         | 256, 128, 64         |
| <b>Hidden activation</b>          | ReLU                   | ReLU                 | ReLU                 | ReLU                 |
| <b>Output layer</b>               | Dense(1), linear       | Dense(1), linear     | Dense(1), linear     | Dense(1), linear     |
| <b>Loss</b>                       | MSE                    | MSE                  | MSE                  | MSE                  |
| <b>Optimizer</b>                  | Adam                   | Adam                 | Adam                 | Adam                 |
| <b>Learning rate</b>              | $1.0 \times 10^{-3}$   | $1.0 \times 10^{-4}$ | $1.0 \times 10^{-3}$ | $1.0 \times 10^{-3}$ |
| <b>Total parameters</b>           | 54,529                 | 54,529               | 54,785               | 54,785               |

### Section S3.2. Training details of the Single-Feature Stacking (SFS) Data

**Table S4.** Fugacities used in GCMC simulations of  $\text{CO}_2$  and  $\text{C}_3\text{H}_8$ . Separate pressure sets were employed for training, validation, and testing datasets, with grids defined conditionally on the parent MOF void fraction (VF).

| Void fraction regime | Fugacity (bar) |          |      |
|----------------------|----------------|----------|------|
|                      | Validation     | Training | Test |
| VF < 0.8             | 0.02           | 0.01     | 0.04 |

|               |      |      |      |
|---------------|------|------|------|
|               | 0.08 | 0.05 | 0.06 |
|               | 0.3  | 0.1  | 0.6  |
|               | 1.5  | 0.5  | 1    |
|               | 7    | 2    | 15   |
|               | 50   | 10   | 50   |
|               | -    | 80   | 75   |
| VF $\geq$ 0.8 | 0.02 | 0.01 | 0.04 |
|               | 0.2  | 0.1  | 0.06 |
|               | 2    | 2    | 0.6  |
|               | 20   | 10   | 1    |
|               | 50   | 40   | 15   |
|               | 90   | 70   | 50   |
|               | -    | 100  | 75   |

Fugacity grids were selected to span low- to high-loading regimes while minimizing overlap between training, validation, and testing datasets.

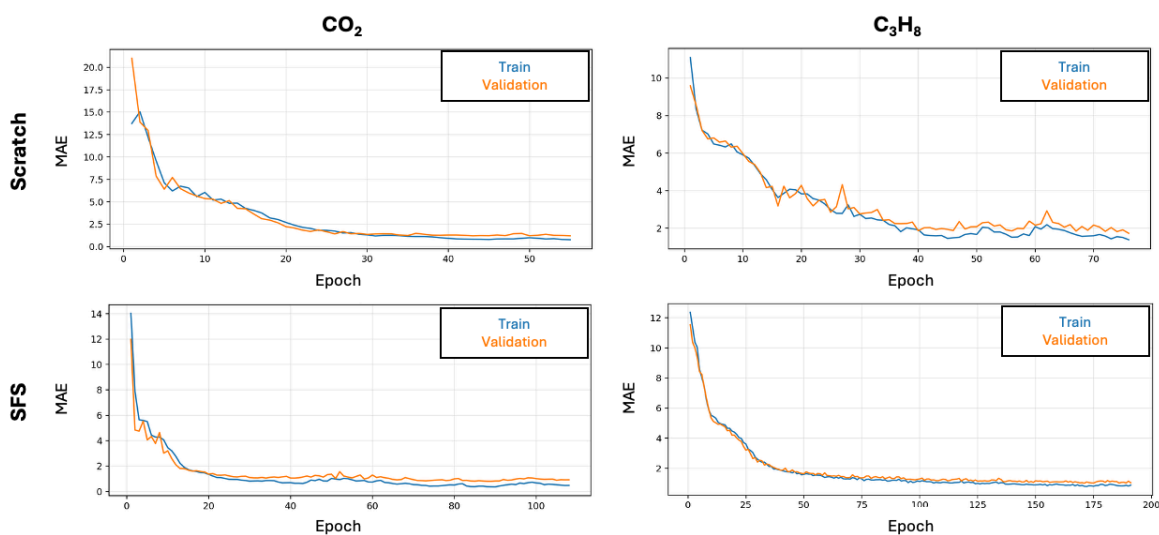

**Fig. S4.** Learning curves for CO<sub>2</sub> and C<sub>3</sub>H<sub>8</sub> prediction via SFS and Scratch models using mean absolute error to follow the model progress through epochs used. These learning curves are the result of training these strategies on 10% of the available data. Training curve in blue and validation curve in orange.

## Section S4. Henry’s Constant Prediction at full data availability

### Section S4.1. Machine Learning Details

Additional data files for this section can be found at:

<https://osf.io/vu3hn/overview>

In the folder *Henry\_Coeff\_training\_extra\_documentation*

**Specific dependencies used to construct  $K_H$  prediction models.** Machine learning models and accompanying data analysis were implemented in Python 3.12.2, for which relevant dependencies can be found in **Table S5**.

**Table S5.** Computational dependencies used in the training validation and testing of the ML models to predict  $K_H$  using the 2D-IPH.

| Dependency        | Purpose                                                                            |
|-------------------|------------------------------------------------------------------------------------|
| joblib1.5.0       | Feature/target scaler saving                                                       |
| matplotlib3.10.3  | Plotting                                                                           |
| numpy2.1.3        | Data processing and optimized data structure use                                   |
| pandas2.2.3       | Data processing and handling                                                       |
| scikit-learn1.6.1 | Machine learning metric calculation, data processing, model performance evaluation |
| scipy1.15.3       | Model performance evaluation and plotting                                          |
| tensorflow2.19.0  | Machine learning model training and saving.                                        |

**Data Processing.** After matching the histograms with corresponding  $K_H$  values for CO<sub>2</sub>, H<sub>2</sub>O, N<sub>2</sub>, and NH<sub>3</sub>, the resulting feature and target data was randomly split into training, validation, and test sets for unbiased model training, with split amounts described in **Table S6**. There is no overlap between each set of data, and the  $K_H$  parameters are transformed into  $\log_{10}(K_H)$  values to ensure that the target data follows a pseudo-normal distribution for model prediction.

**Table S6.** Distribution of the available  $K_H$  subset in training, validation and testing. Count of the actual number of structures in each partition is included.

| Dataset    | % Of Total Data | Count of Structures |
|------------|-----------------|---------------------|
| Training   | 64%             | 25,568              |
| Validation | 16%             | 6,392               |
| Test       | 20%             | 7,990               |

Prior to model training, 2D-IPHS data (4,440 histogram features) and target data (4  $K_H$  targets) were scaled using the *scikit-learn StandardScaler* method. Scalers used in the training set to avoid leaking validation and test data into downstream model training efforts.

**Scratch Model Training.** For all model training and hyperparameter exploration, a fixed training/validation/test split was used, with test data held out from model development.

Hyperparameters were optimized via *GridSearchCV* (*scikit-learn*) over the discrete parameter grids in **Table S7**. Models were trained for 100 epochs, at which point performance gains plateaued. Selection was based on test-set MSE, with R<sup>2</sup> used as tiebreaker when

needed. The search proceeded coarse-to-fin, with optimizer type fixed early and activation functions selected after stabilizing architectural parameters.

Because MLP and CNN architectures share the same base structure, their hyperparameters searches were conducted jointly, where convolution-specific parameters collapse to zero when the MLP outperforms the CNN. Input histograms were reshaped to 2D to enable convolutional operations when needed.

As shown in **Table S7**, the best performing MLP architecture consists of five layers (one input, three hidden, and one output). Dropout of 30% was applied after each hidden layer. The hidden layers use Sigmoid, Sigmoid, and ReLU activation functions, respectively.

**Table S7.** Parameters used during the hyperparameter exploration of MLPs and CNNs to predict  $K_H$ . The table shows the range or specific values used, along the selected parameters that describe an MLP as the model with the best performance.

| Hyperparameter                     | Tested Value Range | Tested Values                  | Final Value     |
|------------------------------------|--------------------|--------------------------------|-----------------|
| No. Convolutional Layers ( $C_L$ ) | 0 - 1              | -                              | 0               |
| No. Convolution Filters ( $C_F$ )  | 16 - 256           | -                              | -               |
| Kernel Size ( $S_K$ )              | -                  | (3, 3), (5, 5), (7, 7), (9, 9) | -               |
| Stride Size ( $S_S$ )              | -                  | (3, 3), (5, 5), (7, 7), (9, 9) | -               |
| No. Dense Layers ( $N_D$ )         | 0 - 5              | -                              | 3               |
| No. Dense Neurons ( $N_{DN}$ )     | 8 - 256            | -                              | 128 - 128 - 128 |
| Dropout (D)                        | 0 - 0.5            | -                              | 0.3             |
| Batch Size (B)                     | 2 - 512            | -                              | 32              |
| Learning Rate (L)                  | 0.0001 - 0.0200    | -                              | 0.0014          |
| Optimizer (O)                      | -                  | Adam, RMSprop, Momentum        | Adam            |
| Activation (A)                     | -                  | Sigmoid (S), ReLu (R)          | S - S - R       |

To further test the data splitting distributions, we divided the data in the training/validation/test using three different distributions but following the same percentages. Models in each data splitting were trained and compared in performance. A comparison between prediction accuracies for these new data splits and the scratch model performance are included in **Table S8**.

**Table S8.** Performance comparison of the models created to predict each molecule  $K_H$  from scratch using 4 different splitting distributions (Scratch—the one reported, and 1 to 3 data splits). Mean squared error (MSE) and  $R^2$  used as performance metrics.

| Split   | Metric | CO <sub>2</sub> | H <sub>2</sub> O | N <sub>2</sub> | NH <sub>3</sub> |
|---------|--------|-----------------|------------------|----------------|-----------------|
| Scratch | MSE    | 0.251           | 0.184            | 0.097          | 0.177           |
|         | $R^2$  | 0.756           | 0.819            | 0.902          | 0.823           |
| 1       | MSE    | 0.277           | 0.189            | 0.094          | 0.187           |
|         | $R^2$  | 0.739           | 0.814            | 0.908          | 0.819           |
| 2       | MSE    | 0.267           | 0.186            | 0.109          | 0.186           |

|   |       |       |       |       |       |
|---|-------|-------|-------|-------|-------|
|   | $R^2$ | 0.750 | 0.824 | 0.891 | 0.827 |
| 3 | MSE   | 0.274 | 0.184 | 0.097 | 0.172 |
|   | $R^2$ | 0.742 | 0.820 | 0.903 | 0.829 |

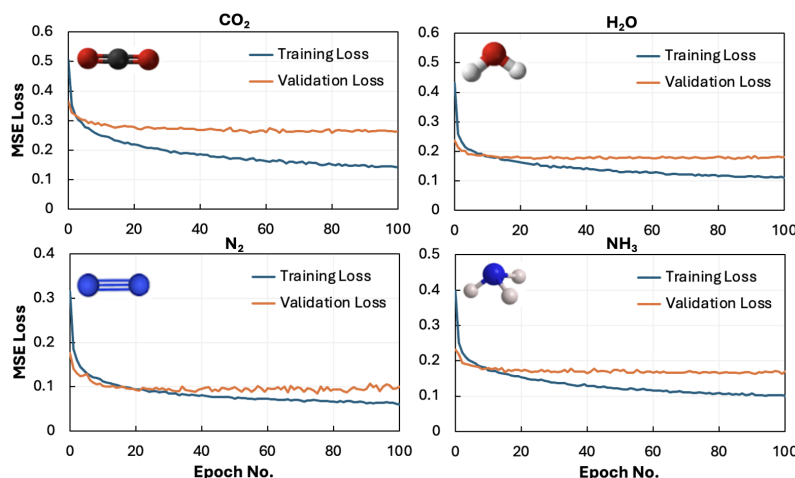

Figure S5. Learning rate curves for the training of the scratch model to predict  $K_H$  in  $\text{CO}_2$ ,  $\text{H}_2\text{O}$ ,  $\text{N}_2$ , and  $\text{NH}_3$ .

## Section S5. Henry’s Constant Prediction via Transfer Learning

### Section S5.1. Machine Learning Details

**Transfer Model Training.** Frozen representations were obtained by passing input features through a pretrained scratch model and extracting the activations of the final frozen layer (a 128-dimensional vector corresponding to 128 neurons). These activations were then used as input features to train a new MLP composed of the remaining layers with the new target task. Accordingly, each transfer learning configuration consists of a pretrained “*base*” model providing frozen feature representations and a newly trained “*transfer*” model that learns the target-specific mapping. The intermediate features extracted from the base model were used without additional scaling. Because the scratch model consists of three hidden layers, transfer learning was evaluated by freezing layer 1, layers 1-2, and layers 1-3, followed by retraining the remaining unfrozen layers, including the output layer. A summary of transfer learning performance across all configurations is provided in **Table S9**. This comparison corresponds to the training using 100% of the data available.

**Table S9.** Performance comparison of the models created to predict each molecule  $K_H$  using transfer learning strategy. Mean squared error (MSE) and  $R^2$  used as performance metrics. Results present the performance when 1, 1 and 2, and 1 to 3 hidden layers are frozen. For each considered target molecule ( $\text{H}_2\text{O}$ ,  $\text{N}_2$ ,  $\text{NH}_3$ , and  $\text{CO}_2$ ).

| Base Target   | Transfer Target      | Metric | Freeze 1 | Freeze 1-2 | Freeze 1-3 |
|---------------|----------------------|--------|----------|------------|------------|
| $\text{CO}_2$ | $\text{H}_2\text{O}$ | MAE    | 1.292    | 1.525      | 1.905      |
|               |                      | $R^2$  | 0.790    | 0.682      | 0.528      |
|               | $\text{N}_2$         | MAE    | 0.124    | 0.187      | 0.219      |
|               |                      | $R^2$  | 0.804    | 0.588      | 0.429      |
|               | $\text{NH}_3$        | MAE    | 0.991    | 1.097      | 1.392      |
|               |                      | $R^2$  | 0.779    | 0.697      | 0.562      |

|                  |                  |                |       |       |       |
|------------------|------------------|----------------|-------|-------|-------|
| H <sub>2</sub> O | CO <sub>2</sub>  | MAE            | 0.414 | 0.447 | 0.569 |
|                  |                  | R <sup>2</sup> | 0.680 | 0.610 | 0.467 |
|                  | N <sub>2</sub>   | MAE            | 0.135 | 0.188 | 0.245 |
| R <sup>2</sup>   |                  | 0.774          | 0.593 | 0.303 |       |
| N <sub>2</sub>   | CO <sub>2</sub>  | MAE            | 0.415 | 0.527 | 0.628 |
|                  |                  | R <sup>2</sup> | 0.661 | 0.475 | 0.249 |
|                  | H <sub>2</sub> O | MAE            | 1.318 | 2.055 | 2.393 |
| R <sup>2</sup>   |                  | 0.762          | 0.448 | 0.154 |       |
| NH <sub>3</sub>  | CO <sub>2</sub>  | MAE            | 0.417 | 0.422 | 0.536 |
|                  |                  | R <sup>2</sup> | 0.687 | 0.637 | 0.510 |
|                  | H <sub>2</sub> O | MAE            | 1.356 | 1.192 | 1.507 |
| R <sup>2</sup>   |                  | 0.787          | 0.798 | 0.682 |       |
| NH <sub>3</sub>  | CO <sub>2</sub>  | MAE            | 0.124 | 0.182 | 0.242 |
|                  |                  | R <sup>2</sup> | 0.799 | 0.604 | 0.307 |

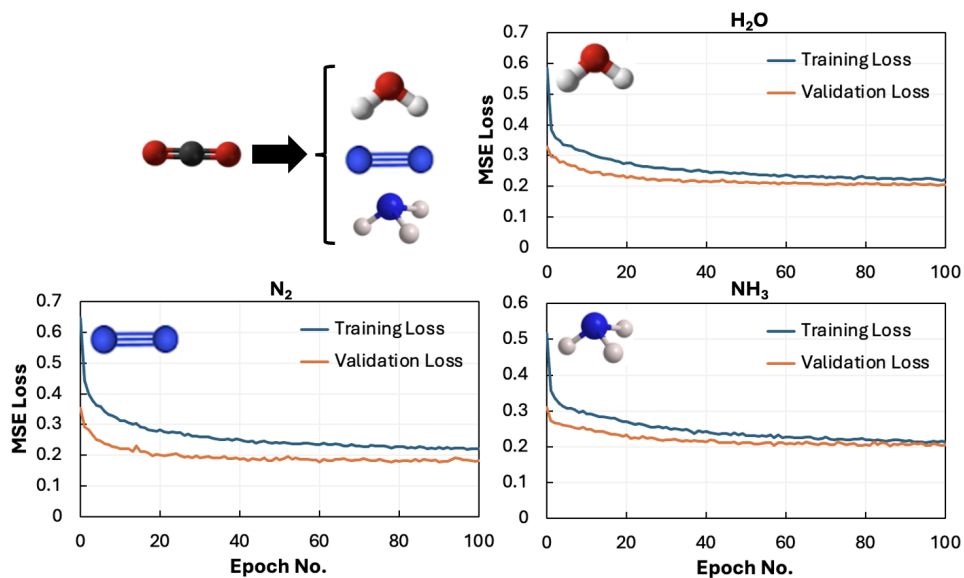

Figure S6. Learning curves for transfer learning with layer 1 frozen and source task CO<sub>2</sub> to predict H<sub>2</sub>O, N<sub>2</sub>, and NH<sub>3</sub>.

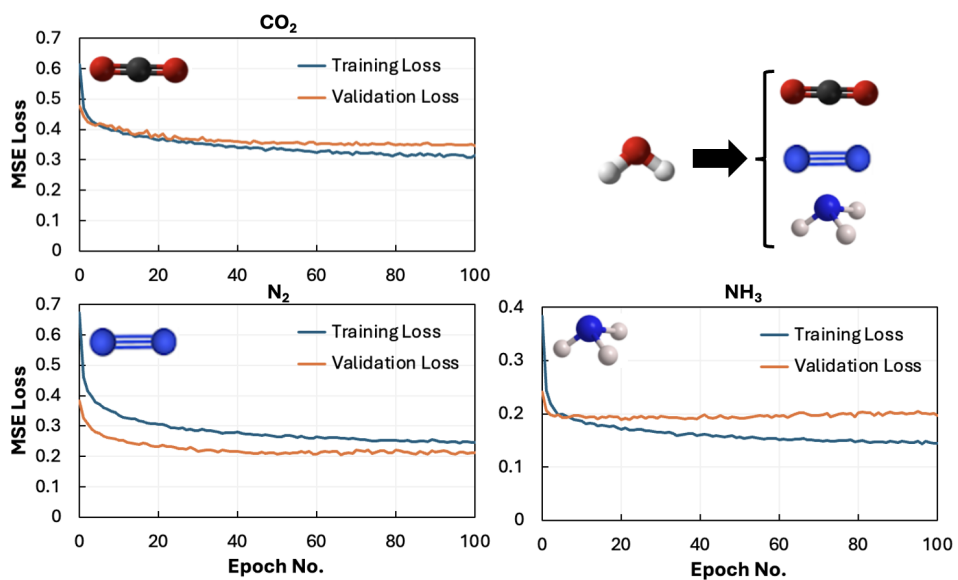

Figure S7. Learning curves for transfer learning with layer 1 frozen and source task  $\text{H}_2\text{O}$  to predict  $\text{CO}_2$ ,  $\text{N}_2$ , and  $\text{NH}_3$ .

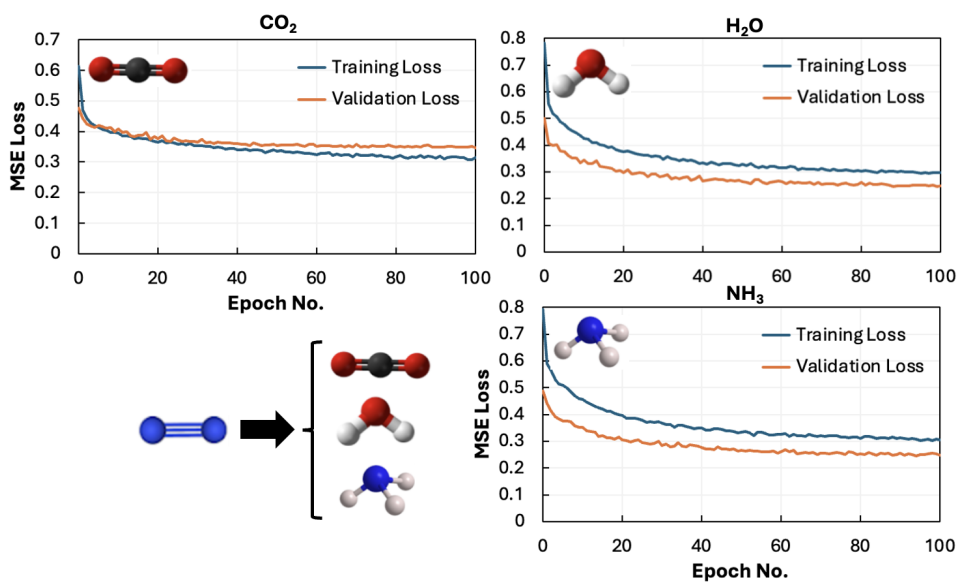

Figure S8. Learning curves for transfer learning with layer 1 frozen and source task  $\text{N}_2$  to predict  $\text{H}_2\text{O}$ ,  $\text{CO}_2$ , and  $\text{NH}_3$ .

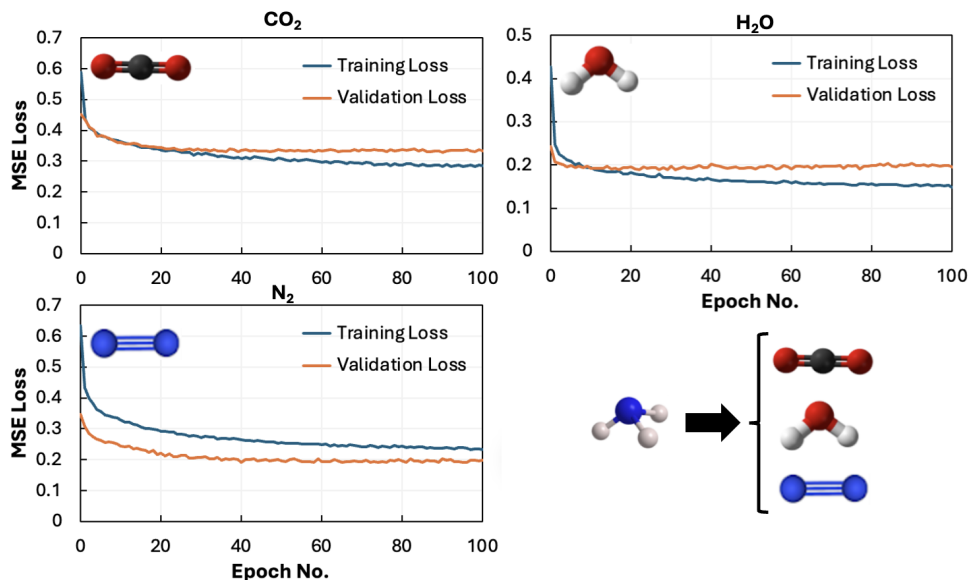

**Figure S9.** Learning curves for transfer learning with layer 1 frozen and source task  $\text{NH}_3$  to predict  $\text{N}_2$ ,  $\text{H}_2\text{O}$ , and  $\text{CO}_2$ .

**Data Scarcity.** Different levels of data availability were used to test the effect of data-scarcity in the transfer learning strategy. The data-scarce scenarios studied were 50%, 30%, 10%, 5%, 3%, 1% of the available data per molecule. The test dataset was kept fixed and not used in any training process to prevent data leakage. The data-scarce datasets were subsequently processed through the same machine learning pipelines used in the full-data experiments. When transfer learning was evaluated under data-scarce conditions, the reduced datasets were used exclusively to train the transfer learning models, while the source model corresponded to the scratch model trained on the full dataset.

A full summary of all models trained with data scarcity can be found in **Tables S10 to Table S17**.

**Table S10.** Performance summary of the  $\text{CO}_2$  as source task to transfer for the considered molecules. (-) represent scratch model. The table includes statistics of the practical test conducted in the identification of the top- $n$  MOFs using simulated  $K_{\text{H}}$  as reference.

| Base Target   | Transfer Target      | % Data | MAE   | $R^2$ | Top 800 | Top 400 | Top 200 |
|---------------|----------------------|--------|-------|-------|---------|---------|---------|
| $\text{CO}_2$ | -                    | 50%    | 0.330 | 0.740 | 556     | 230     | 98      |
|               |                      | 10%    | 0.357 | 0.661 | 529     | 211     | 92      |
|               |                      | 5%     | 0.413 | 0.604 | 494     | 197     | 78      |
|               |                      | 3%     | 0.421 | 0.539 | 494     | 199     | 68      |
|               |                      | 1%     | 0.559 | 0.259 | 375     | 138     | 42      |
|               | $\text{H}_2\text{O}$ | 50%    | 1.270 | 0.787 | 637     | 281     | 120     |
|               |                      | 10%    | 1.377 | 0.752 | 629     | 278     | 117     |
|               |                      | 5%     | 1.426 | 0.723 | 610     | 268     | 116     |
|               |                      | 3%     | 1.504 | 0.689 | 567     | 266     | 118     |
|               |                      | 1%     | 1.531 | 0.673 | 565     | 258     | 104     |
|               | $\text{N}_2$         | 50%    | 0.127 | 0.795 | 636     | 293     | 139     |
|               |                      | 10%    | 0.132 | 0.771 | 614     | 277     | 129     |
|               |                      | 5%     | 0.144 | 0.729 | 592     | 266     | 124     |
|               |                      | 3%     | 0.154 | 0.694 | 590     | 253     | 126     |

|  |                 |     |       |       |     |     |     |
|--|-----------------|-----|-------|-------|-----|-----|-----|
|  |                 | 1%  | 0.178 | 0.605 | 562 | 252 | 114 |
|  |                 | 50% | 0.967 | 0.784 | 601 | 263 | 107 |
|  |                 | 10% | 0.981 | 0.747 | 567 | 239 | 100 |
|  | NH <sub>3</sub> | 5%  | 1.064 | 0.720 | 554 | 246 | 101 |
|  |                 | 3%  | 1.093 | 0.706 | 553 | 248 | 107 |
|  |                 | 1%  | 1.189 | 0.671 | 494 | 240 | 106 |

**Table S11.** Performance summary of the H<sub>2</sub>O as source task to transfer for the considered molecules. (-) represent scratch model. The table includes statistics of the practical test conducted in the identification of the top-*n* MOFs using simulated K<sub>H</sub> as reference.

| Base Target      | Transfer Target | % Data | MAE   | R <sup>2</sup> | Top 800 | Top 400 | Top 200 |
|------------------|-----------------|--------|-------|----------------|---------|---------|---------|
| H <sub>2</sub> O | -               | 50%    | 1.142 | 0.807          | 635     | 287     | 115     |
|                  |                 | 10%    | 1.262 | 0.779          | 617     | 279     | 111     |
|                  |                 | 5%     | 1.352 | 0.737          | 613     | 277     | 113     |
|                  |                 | 3%     | 1.450 | 0.694          | 598     | 260     | 101     |
|                  |                 | 1%     | 1.707 | 0.571          | 548     | 252     | 74      |
|                  | CO <sub>2</sub> | 50%    | 0.417 | 0.669          | 520     | 224     | 95      |
|                  |                 | 10%    | 0.410 | 0.643          | 505     | 204     | 92      |
|                  |                 | 5%     | 0.432 | 0.626          | 504     | 199     | 89      |
|                  |                 | 3%     | 0.453 | 0.599          | 487     | 202     | 86      |
|                  |                 | 1%     | 0.490 | 0.528          | 436     | 177     | 76      |
|                  | N <sub>2</sub>  | 50%    | 0.134 | 0.777          | 629     | 283     | 133     |
|                  |                 | 10%    | 0.149 | 0.724          | 601     | 277     | 117     |
|                  |                 | 5%     | 0.155 | 0.693          | 589     | 266     | 114     |
|                  |                 | 3%     | 0.167 | 0.659          | 564     | 268     | 121     |
|                  |                 | 1%     | 0.203 | 0.490          | 535     | 248     | 119     |
|                  | NH <sub>3</sub> | 50%    | 0.974 | 0.788          | 595     | 261     | 116     |
|                  |                 | 10%    | 0.907 | 0.793          | 595     | 260     | 114     |
|                  |                 | 5%     | 0.917 | 0.786          | 591     | 260     | 107     |
|                  |                 | 3%     | 0.921 | 0.779          | 592     | 246     | 105     |
|                  |                 | 1%     | 0.916 | 0.776          | 593     | 253     | 108     |

**Table S12.** Performance summary of the N<sub>2</sub> as source task to transfer for the considered molecules. (-) represent scratch model. The table includes statistics of the practical test conducted in the identification of the top-*n* MOFs using simulated K<sub>H</sub> as reference.

| Base Target    | Transfer Target  | % Data | MAE   | R <sup>2</sup> | Top 800 | Top 400 | Top 200 |
|----------------|------------------|--------|-------|----------------|---------|---------|---------|
| N <sub>2</sub> | -                | 50%    | 0.082 | 0.895          | 700     | 323     | 156     |
|                |                  | 10%    | 0.099 | 0.853          | 661     | 289     | 139     |
|                |                  | 5%     | 0.111 | 0.811          | 623     | 276     | 124     |
|                |                  | 3%     | 0.124 | 0.791          | 608     | 268     | 129     |
|                |                  | 1%     | 0.189 | -0.022         | 569     | 241     | 108     |
|                | CO <sub>2</sub>  | 50%    | 0.386 | 0.659          | 532     | 213     | 93      |
|                |                  | 10%    | 0.412 | 0.613          | 496     | 206     | 87      |
|                |                  | 5%     | 0.438 | 0.587          | 489     | 201     | 77      |
|                |                  | 3%     | 0.444 | 0.550          | 474     | 202     | 76      |
|                |                  | 1%     | 0.516 | 0.466          | 443     | 175     | 62      |
|                | H <sub>2</sub> O | 50%    | 1.340 | 0.743          | 622     | 284     | 119     |

|                 |     |       |       |     |     |     |
|-----------------|-----|-------|-------|-----|-----|-----|
|                 | 10% | 1.481 | 0.689 | 598 | 279 | 108 |
|                 | 5%  | 1.639 | 0.629 | 562 | 270 | 116 |
|                 | 3%  | 1.669 | 0.592 | 553 | 248 | 100 |
|                 | 1%  | 2.039 | 0.480 | 519 | 255 | 87  |
|                 | 50% | 1.016 | 0.732 | 576 | 249 | 110 |
| NH <sub>3</sub> | 10% | 1.118 | 0.673 | 553 | 228 | 84  |
|                 | 5%  | 1.260 | 0.605 | 507 | 213 | 84  |
|                 | 3%  | 1.311 | 0.575 | 497 | 210 | 88  |
|                 | 1%  | 1.434 | 0.468 | 451 | 172 | 72  |

**Table S13.** Performance summary of the NH<sub>3</sub> as source task to transfer for the considered molecules. (-) represent scratch model. The table includes statistics of the practical test conducted in the identification of the top-*n* MOFs using simulated K<sub>H</sub> as reference.

| Base Target     | Transfer Target  | % Data | MAE   | R <sup>2</sup> | Top 800 | Top 400 | Top 200 |
|-----------------|------------------|--------|-------|----------------|---------|---------|---------|
| NH <sub>3</sub> | -                | 50%    | 0.842 | 0.809          | 594     | 267     | 111     |
|                 |                  | 10%    | 0.900 | 0.767          | 578     | 243     | 101     |
|                 |                  | 5%     | 0.974 | 0.722          | 537     | 240     | 94      |
|                 |                  | 3%     | 1.022 | 0.716          | 561     | 240     | 93      |
|                 |                  | 1%     | 1.214 | 0.616          | 517     | 204     | 79      |
|                 | CO <sub>2</sub>  | 50%    | 0.396 | 0.691          | 527     | 220     | 101     |
|                 |                  | 10%    | 0.402 | 0.669          | 504     | 214     | 88      |
|                 |                  | 5%     | 0.411 | 0.649          | 499     | 204     | 88      |
|                 |                  | 3%     | 0.404 | 0.639          | 496     | 207     | 92      |
|                 |                  | 1%     | 0.461 | 0.583          | 453     | 187     | 83      |
|                 | H <sub>2</sub> O | 50%    | 1.253 | 0.797          | 652     | 289     | 114     |
|                 |                  | 10%    | 1.178 | 0.796          | 647     | 287     | 113     |
|                 |                  | 5%     | 1.231 | 0.789          | 643     | 278     | 106     |
|                 |                  | 3%     | 1.274 | 0.785          | 624     | 274     | 110     |
|                 |                  | 1%     | 1.304 | 0.771          | 634     | 271     | 109     |
|                 | N <sub>2</sub>   | 50%    | 0.134 | 0.772          | 635     | 279     | 135     |
| 10%             |                  | 0.135  | 0.758 | 614            | 271     | 118     |         |
| 5%              |                  | 0.148  | 0.709 | 587            | 256     | 113     |         |
| 3%              |                  | 0.158  | 0.681 | 586            | 247     | 111     |         |
| 1%              |                  | 0.205  | 0.464 | 576            | 254     | 114     |         |

**Table S14.** Relative performance of the scratch model to predict K<sub>H</sub> of H<sub>2</sub>O versus the use of NH<sub>3</sub> as source task to predict H<sub>2</sub>O using transfer learning at different data-scarce scenarios. The table includes statistics of the practical test conducted in the identification of the top-*n* MOFs using simulated K<sub>H</sub> as reference.

| Model                              | Data (%) | n = 800 | n = 400 | n = 200 |
|------------------------------------|----------|---------|---------|---------|
| Scratch                            | 100      | 649     | 291     | 120     |
| NH <sub>3</sub> → H <sub>2</sub> O |          | 653     | 288     | 112     |
| Scratch                            | 50       | 644     | 287     | 119     |
| NH <sub>3</sub> → H <sub>2</sub> O |          | 652     | 289     | 114     |
| Scratch                            | 30       | 636     | 281     | 116     |
| NH <sub>3</sub> → H <sub>2</sub> O |          | 653     | 286     | 119     |

|                                    |    |     |     |     |
|------------------------------------|----|-----|-----|-----|
| Scratch                            | 10 | 612 | 276 | 106 |
| NH <sub>3</sub> → H <sub>2</sub> O |    | 647 | 287 | 113 |
| Scratch                            | 5  | 613 | 267 | 109 |
| NH <sub>3</sub> → H <sub>2</sub> O |    | 643 | 278 | 106 |
| Scratch                            | 3  | 576 | 252 | 102 |
| NH <sub>3</sub> → H <sub>2</sub> O |    | 624 | 274 | 110 |
| Scratch                            | 1  | 556 | 244 | 101 |
| NH <sub>3</sub> → H <sub>2</sub> O |    | 634 | 271 | 109 |

**Table S15.** Relative performance of the scratch model to predict  $K_H$  of NH<sub>3</sub> versus the use of H<sub>2</sub>O as source task to predict NH<sub>3</sub> using transfer learning at different data-scarce scenarios. The table includes statistics of the practical test conducted in the identification of the top- $n$  MOFs using simulated  $K_H$  as reference.

| Model                              | Data (%) | n = 800 | n = 400 | n = 200 |
|------------------------------------|----------|---------|---------|---------|
| Scratch                            | 100      | 607     | 265     | 116     |
| H <sub>2</sub> O → NH <sub>3</sub> |          | 602     | 268     | 122     |
| Scratch                            | 50       | 600     | 260     | 120     |
| H <sub>2</sub> O → NH <sub>3</sub> |          | 595     | 261     | 116     |
| Scratch                            | 30       | 591     | 259     | 111     |
| H <sub>2</sub> O → NH <sub>3</sub> |          | 591     | 266     | 114     |
| Scratch                            | 10       | 556     | 243     | 110     |
| H <sub>2</sub> O → NH <sub>3</sub> |          | 595     | 260     | 114     |
| Scratch                            | 5        | 558     | 237     | 101     |
| H <sub>2</sub> O → NH <sub>3</sub> |          | 591     | 260     | 107     |
| Scratch                            | 3        | 530     | 191     | 78      |
| H <sub>2</sub> O → NH <sub>3</sub> |          | 592     | 246     | 105     |
| Scratch                            | 1        | 484     | 208     | 74      |
| H <sub>2</sub> O → NH <sub>3</sub> |          | 593     | 253     | 108     |

**Table S16.** Relative performance of the scratch model to predict  $K_H$  of CO<sub>2</sub> versus the use of NH<sub>3</sub> as source task to predict CO<sub>2</sub> using transfer learning at different data-scarce scenarios. The table includes statistics of the practical test conducted in the identification of the top- $n$  MOFs using simulated  $K_H$  as reference.

| Model                             | Data (%) | n = 800 | n = 400 | n = 200 |
|-----------------------------------|----------|---------|---------|---------|
| Scratch                           | 100      | 569     | 245     | 104     |
| NH <sub>3</sub> → CO <sub>2</sub> |          | 529     | 221     | 99      |
| Scratch                           | 50       | 566     | 243     | 101     |

|                                   |    |     |     |     |
|-----------------------------------|----|-----|-----|-----|
| NH <sub>3</sub> → CO <sub>2</sub> |    | 527 | 220 | 101 |
| Scratch                           | 30 | 546 | 229 | 96  |
| NH <sub>3</sub> → CO <sub>2</sub> |    | 524 | 221 | 94  |
| Scratch                           | 10 | 511 | 208 | 83  |
| NH <sub>3</sub> → CO <sub>2</sub> |    | 504 | 214 | 88  |
| Scratch                           | 5  | 496 | 202 | 86  |
| NH <sub>3</sub> → CO <sub>2</sub> |    | 499 | 204 | 88  |
| Scratch                           | 3  | 500 | 192 | 75  |
| NH <sub>3</sub> → CO <sub>2</sub> |    | 496 | 207 | 92  |
| Scratch                           | 1  | 433 | 165 | 50  |
| NH <sub>3</sub> → CO <sub>2</sub> |    | 453 | 187 | 83  |

**Table S17.** Relative performance of the scratch model to predict  $K_H$  of N<sub>2</sub> versus the use of NH<sub>3</sub> as source task to predict N<sub>2</sub> using transfer learning at different data-scarce scenarios. The table includes statistics of the practical test conducted in the identification of the top- $n$  MOFs using simulated  $K_H$  as reference.

| Model                            | Data (%) | n = 800 | n = 400 | n = 200 |
|----------------------------------|----------|---------|---------|---------|
| Scratch                          | 100      | 709     | 335     | 158     |
| NH <sub>3</sub> → N <sub>2</sub> |          | 645     | 281     | 134     |
| Scratch                          | 50       | 702     | 328     | 159     |
| NH <sub>3</sub> → N <sub>2</sub> |          | 635     | 279     | 135     |
| Scratch                          | 30       | 700     | 319     | 155     |
| NH <sub>3</sub> → N <sub>2</sub> |          | 629     | 269     | 131     |
| Scratch                          | 10       | 665     | 300     | 132     |
| NH <sub>3</sub> → N <sub>2</sub> |          | 614     | 271     | 118     |
| Scratch                          | 5        | 628     | 280     | 128     |
| NH <sub>3</sub> → N <sub>2</sub> |          | 587     | 256     | 113     |
| Scratch                          | 3        | 626     | 278     | 125     |
| NH <sub>3</sub> → N <sub>2</sub> |          | 586     | 247     | 111     |
| Scratch                          | 1        | 603     | 252     | 85      |
| NH <sub>3</sub> → N <sub>2</sub> |          | 576     | 254     | 114     |

## Section S6. Model variation tests

### Section S6.1. Performance Comparison of Different Representation Variants in the Prediction of Molecular Loading and Henry's Coefficient

For molecular loading, we assessed the performance of two representation approaches: *i*) 2D-IPH only, and *ii*) 2D-IPH + textural properties. Textural properties include the largest pore diameter (LPD), pore limiting diameter (PLD), gravimetric surface area (SAG), void fraction (VF), and standard deviation of the pore size distribution (PSSD). Both representations performed comparably (MAE  $\sim$  0.3-0.2,  $R^2 \sim$  0.98-0.99) (**Fig. S10**). The 2D-IPH representation alone captures the essential structure-property relationships, with textural properties providing marginal gains in terms of  $R^2$  and MAE.

For Henry's coefficient, we assessed the performance of three representation approaches: *i*) 2D-IPHS only, and *ii*) 2D-IPH + textural properties, and *iii*) textural properties only. The inclusion of textural properties to the 2D-IPH does not reflect on the prediction performance of the model (**Fig. S11**). Moreover, consistent with Henry's coefficient being interaction-dominated rather than geometry-driven, when considering textural properties representation alone the obtained model presents the worst performance (**Fig. S12**).

These observations are consistent with the hypothesis that the detailed energetic information encoded in 2D-IPHS is particularly useful for adsorption properties at low pressure (fugacity) and dilute regime. At high pressure (fugacity), where adsorption loadings start to be more limited by available physical space than by energetics, the more "summarizing" textural properties bring valuable information.

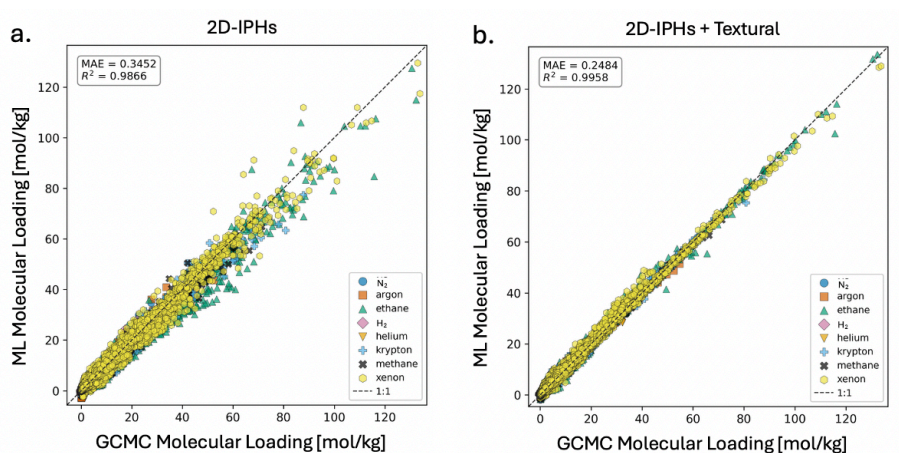

**Fig. S10.** a) ML predictions of loading by general model using only 2D-IPHS (reduced to only 44 features) as input. b) ML predictions of loading by general using 2D-IPHS along with textural properties as input.

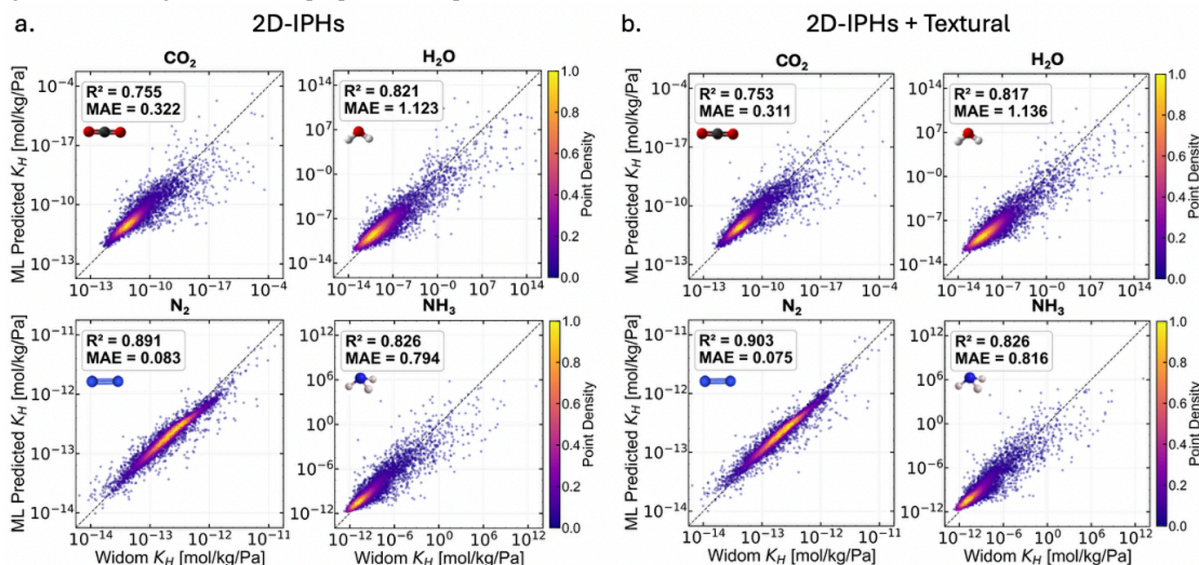

**Fig. S11.** a) ML predictions of  $K_H$  using only 2D-IPHS (all 4,440 features) as input. b) ML predictions of  $K_H$  using 2D-IPHS along with textural properties as input.

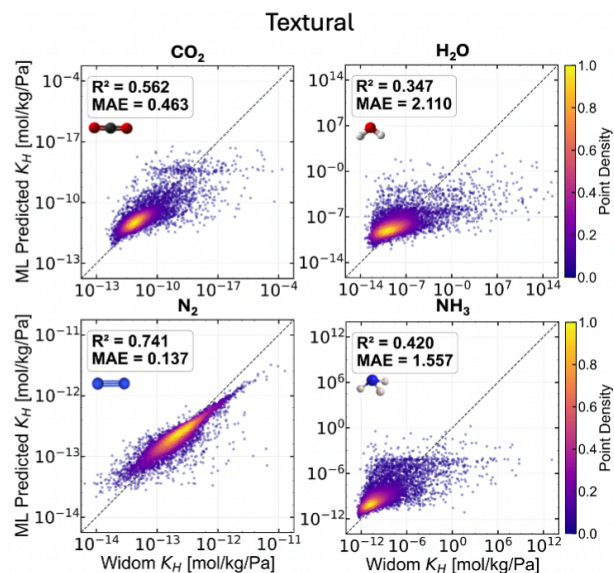

**Fig. S12.** ML predictions of  $K_H$  using only textural properties as input.

## Section S6.2. Grid Resolution

To assess sensitivity to grid and bin resolution, we computed 2D-IPHs for ten randomly selected MOFs across all combinations of grid resolutions (0.5, 1.0, and 2.0 Å) and bin counts (20 and 40), using our default configuration (1.0 Å, 20 bins) as reference. Rather than retraining ML models for each configuration, we use pairwise feature similarity with respect to the reference as a direct proxy for expected model behavior. Representations deviating substantially from the reference will yield degraded predictive performance, as the encoded structural information diverges from that on which the models were optimized.

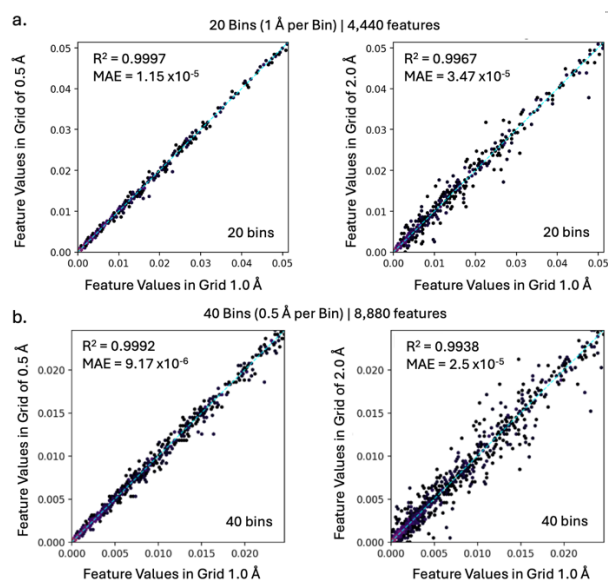

**Fig. S13.** Similarity plot between grid resolution of 1.0 Å versus 0.5 Å (left), and 2.0 Å (right) for a) 20 bins and b) 40 bins resolution used to obtain the 2D-IPHs.

As shown in **Fig. S13**, the 0.5 Å / 20-bin variant most closely reproduces the reference features, suggesting comparable ML performance at moderately increased computational cost. The 2.0 Å grid produces the largest deviations, likely due to increase proximity of coarse grid points to less chemically relevant atoms (due to the current implementation of the 2D-IPHs code) within local adsorption sites. Doubling the bin count to 40 expands the feature vector to 8,880 dimensions, introducing substantial memory overhead and computational cost making it an unfavorable trade-off. Overall, these results confirm that the default 1.0 Å / 20-bin configuration strikes the best balance between representational quality and computational efficiency.

## References

1. Anderson, R., Biong, A. & Gómez-Gualdrón, D. A. Adsorption Isotherm Predictions for Multiple Molecules in MOFs Using the Same Deep Learning Model. *J. Chem. Theory Comput.* **16**, 1271–1283 (2020).
